# Supplementary material for: Understanding music with cochlear implants
Source: PubMed Central journal article supplement (PMC4997320; doi:10.1038/srep32026), 2016-08-25
Supplement: srep32026-s1.pdf [file srep32026-s1.pdf]

# Supplementary information

## Understanding music with cochlear implants

Lisa Bruns, Dirk Mürbe, Anja Hahne\*

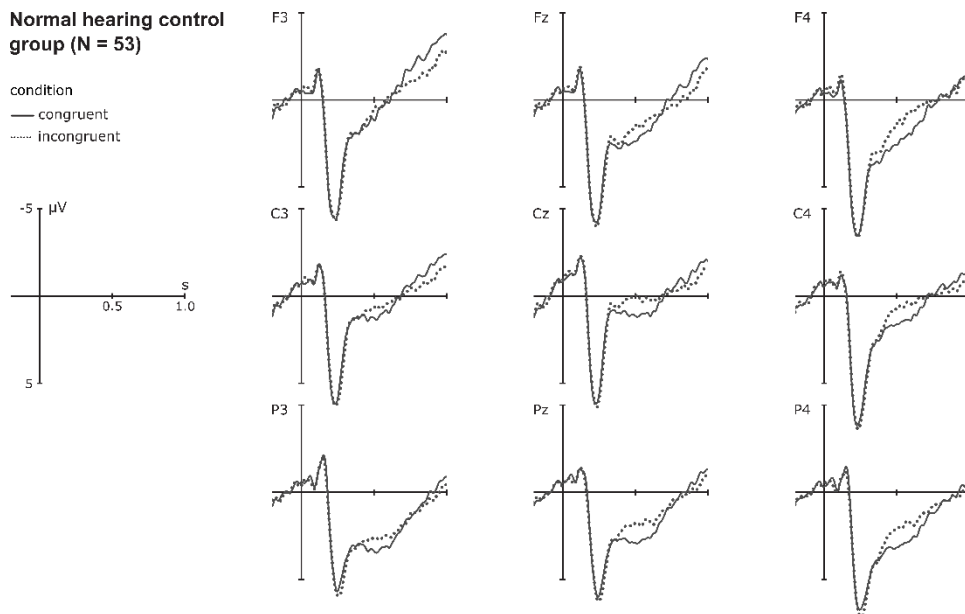

**Supplementary Figure S1** Event-related potentials depict the processing of words preceded by either congruent or incongruent musical excerpts. Grand average ERPs are shown for the normal hearing control group on all measured electrode positions. ERPs for incongruent music-word-stimuli show a more negative excursion between 400 – 600 ms than ERPs for congruent stimuli. This N400 effect reflects the processing of musical meaning in the normal hearing control group.

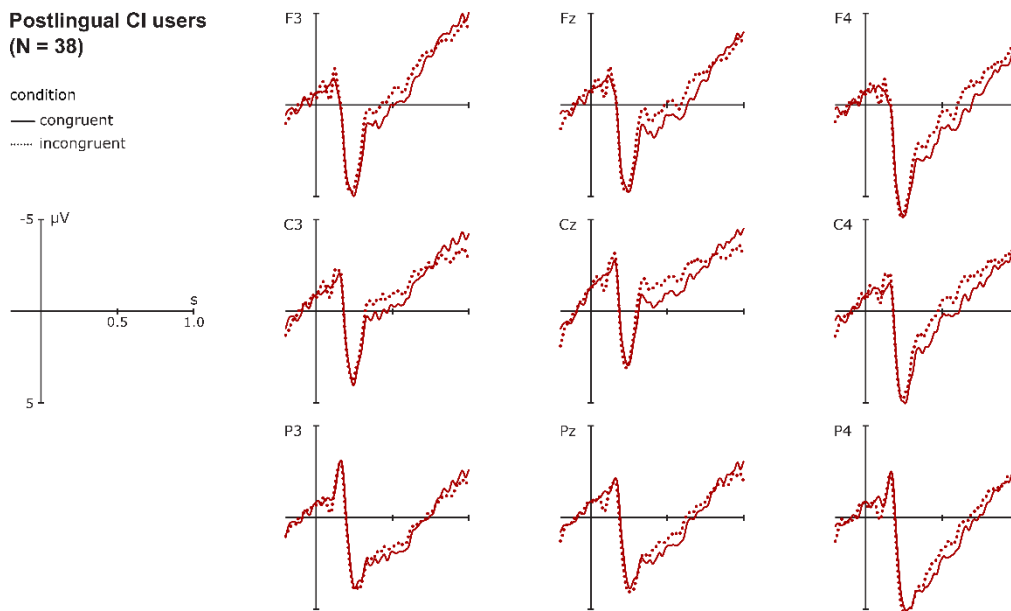

**Supplementary Figure S2** Event-related potentials depict the processing of words preceded by either congruent or incongruent musical excerpts. Grand average ERPs are shown for the postlingual CI user group on all measured electrode positions. ERPs for incongruent music-word-stimuli show a more negative excursion between 400 – 600 ms than ERPs for congruent stimuli. This N400 effect reflects the processing of musical meaning and indicates restored access to semantic musical representations with the hearing impression of a CI in postlingual CI users.

**Prelingual CI users  
(N = 15)**

condition  
— congruent  
..... incongruent

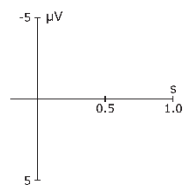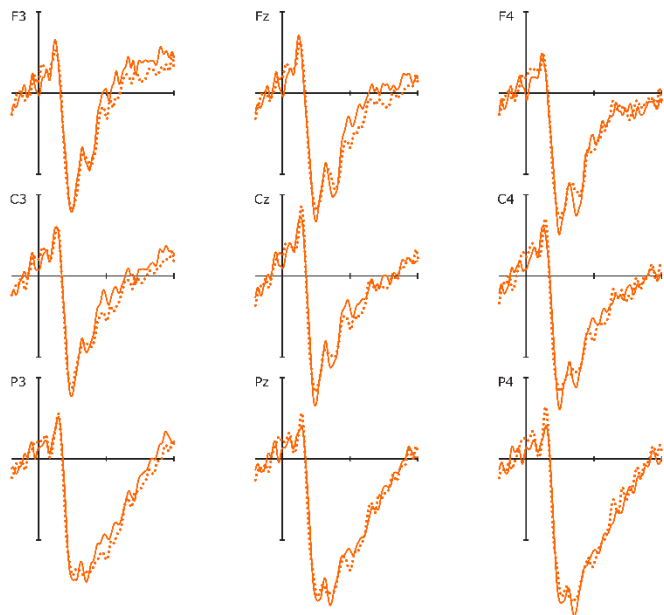

**Supplementary Figure S3** Event-related potentials depict the processing of words preceded by either congruent or incongruent musical excerpts. Grand average ERPs are shown for the prelingual CI user group on all measured electrode positions. No difference is found in the ERPs for incongruent and congruent music-word-stimuli between 400-600 ms. The absent N400 effect indicates missing access to semantic musical representations with CI by the prelingual CI user group probably due to dysfunctional concept formation in childhood.

**Supplementary Table S4** CIU participant demographics and speech comprehension data measured by *Freiburger Einsilbertest*.

| Number | Gender | Age | Group   | Aetiology of hearing loss           | CI type (Implant / processor) | Age at onset of profound hearing loss | Age at Implantation | Months of CI experience | Contralateral use of hearing aid | Numbers 65db | Words 65db |
|--------|--------|-----|---------|-------------------------------------|-------------------------------|---------------------------------------|---------------------|-------------------------|----------------------------------|--------------|------------|
| 1      | f      | 73  | postCIU | hereditary                          | Concerto / Opus 2             | 55                                    | 72                  | 13                      | -                                | 60           | 0          |
| 2      | f      | 72  | postCIU | unknown                             | Concerto / Opus 2             | 40                                    | 71                  | 10                      | +                                | 90           | 30         |
| 3      | f      | 68  | postCIU | acoustic neuroma                    | CI422 / CP810                 | 67                                    | 67                  | 10                      | +                                | 80           | 30         |
| 4      | f      | 74  | postCIU | drug toxicity                       | Concerto / Opus 2             | 73                                    | 73                  | 10                      | +                                | 70           | 50         |
| 5      | f      | 47  | postCIU | unknown, poss. hereditary           | CI422 / CP810                 | -                                     | 46                  | 5                       | +                                | 100          | 90         |
| 6      | f      | 71  | postCIU | ISSHL                               | Concerto / Opus 2             | 68                                    | 70                  | 12                      | -                                | 90           | 10         |
| 7      | f      | 57  | postCIU | otosclerosis                        | CI422 / CP810                 | 52                                    | 56                  | 13                      | +                                | 100          | 95         |
| 8      | f      | 71  | postCIU | unknown, familial                   | Concerto / Opus 2             | 64                                    | 70                  | 11                      | +                                | 40           | 5          |
| 9      | f      | 66  | postCIU | ISSHL                               | Concerto / Opus 2             | 61                                    | 65                  | 10                      | +                                | 100          | 50         |
| 10     | f      | 70  | postCIU | ISSHL                               | CI512 / CP810                 | 35                                    | 68                  | 21                      | -                                | 100          | 70         |
| 11     | f      | 31  | postCIU | prenatal toxoplasmosis, Mb. Menière | CI422 / CP810                 | 26                                    | 29                  | 20                      | -                                | 100          | 90         |
| 12     | f      | 62  | postCIU | unknown                             | CI422 / CP810                 | 50                                    | 62                  | 8                       | +                                | 50           | 35         |
| 13     | f      | 71  | postCIU | ISSHL                               | Concerto / Opus 2             | 61                                    | 69                  | 23                      | +                                | 100          | 45         |
| 14     | f      | 68  | postCIU | ISSHL                               | Concerto / Opus 2             | 65                                    | 68                  | 7                       | -                                | 100          | 70         |
| 15     | f      | 67  | postCIU | cholesteatoma                       | CI422 / CP810                 | -                                     | 65                  | 20                      | -                                | 90           | 20         |
| 16     | f      | 69  | postCIU | noise-induced                       | Concerto / Opus 2             | 46                                    | 67                  | 14                      | -                                | 100          | 70         |
| 17     | f      | 72  | postCIU | unknown                             | HiRes90K / Harmony            | -                                     | 70                  | 20                      | +                                | 100          | 60         |
| 18     | f      | 69  | postCIU | otitis media                        | Concerto / Opus 2             | -                                     | 68                  | 9                       | +                                | 100          | 50         |
| 19     | f      | 63  | postCIU | unknown, ear operation              | CI422 / CP810                 | 56                                    | 62                  | 10                      | +                                | 100          | 75         |
| 20     | f      | 51  | postCIU | acoustic neuroma                    | CI422 / CP810                 | 30                                    | 50                  | 21                      | +                                | 100          | 55         |
| 21     | f      | 65  | postCIU | Mb. Menière                         | Concerto / Opus 2             | 63                                    | 63                  | 21                      | -                                | 100          | 35         |
| 22     | m      | 64  | postCIU | otitis media, familial              | Concerto / Opus 2             | 58                                    | 63                  | 14                      | +                                | 100          | 80         |
| 23     | m      | 79  | postCIU | poss. hereditary, zoster oticus     | CI422 / CP810                 | 77                                    | 78                  | 13                      | -                                | 100          | 30         |

|          |    |   |           |         |                                 |                                                     |             |             |             |   |             |             |
|----------|----|---|-----------|---------|---------------------------------|-----------------------------------------------------|-------------|-------------|-------------|---|-------------|-------------|
|          | 24 | m | 79        | postCIU | blood flow disorder, ISSHL      | CI422 / CP810                                       | 77          | 78          | 11          | - | 100         | 85          |
|          | 25 | m | 72        | postCIU | operation due to cholesteatoma  | Concerto / Opus 2                                   | 55          | 71          | 11          | + | 100         | 45          |
|          | 26 | m | 74        | postCIU | ear operation                   | Concerto / Opus 2                                   | -           | 72          | 14          | - | 100         | 50          |
|          | 27 | m | 69        | postCIU | ISSHL, cholesteatoma            | Concerto / Opus 2                                   | 67          | 68          | 11          | + | 90          | 25          |
|          | 28 | m | 72        | postCIU | ISSHL                           | CI422 / CP810                                       | 69          | 71          | 9           | - | 100         | 60          |
|          | 29 | m | 61        | postCIU | cholesteatoma                   | CI422 / CP810                                       | 58          | 60          | 12          | + | 100         | 80          |
|          | 30 | m | 76        | postCIU | ISSHL                           | HiRes90K / Harmony                                  | 52          | 75          | 16          | + | 100         | 55          |
|          | 31 | m | 71        | postCIU | unknown                         | CI422 / CP810                                       | 66          | 70          | 20          | - | 100         | 60          |
|          | 32 | m | 55        | postCIU | unknown                         | Concerto / Opus 2                                   | 53          | 54          | 7           | + | 100         | 20          |
|          | 33 | m | 46        | postCIU | unknown                         | Concerto / Opus 2                                   | 36          | 46          | 5           | - | 90          | 10          |
|          | 34 | m | 68        | postCIU | ISSHL                           | CI512 / CP810                                       | 66          | 66          | 25          | + | 100         | 80          |
|          | 35 | m | 71        | postCIU | Mb. Menière                     | CI512 / CP810                                       | 67          | 68          | 30          | - | 100         | 90          |
|          | 36 | m | 52        | postCIU | ISSHL                           | Concerto / Opus 2                                   | 45          | 50          | 14          | + | 100         | 50          |
|          | 37 | m | 51        | postCIU | progressive sensorineural HL    | CI512 / CP810                                       | 47          | 50          | 20          | + | 100         | 90          |
|          | 38 | m | 65        | postCIU | noise-induced                   | CI512 / CP810                                       | 63          | 63          | 23          | - | 90          | 20          |
| <b>x</b> |    |   | <b>65</b> |         |                                 |                                                     | <b>56,6</b> | <b>64,1</b> | <b>14,3</b> |   | <b>93,2</b> | <b>51,7</b> |
|          | 39 | f | 31        | preCIU  | unknown, ISSHL                  | left: CI34RE / CP810<br>right: CI512 / CP810        | 3           | 25          | 78          | + | 100         | 70          |
|          | 40 | f | 25        | preCIU  | hereditary                      | HiRes90K / Harmony                                  | 0           | 24          | 13          | + | 100         | 35          |
|          | 41 | f | 40        | preCIU  | unknown                         | left: CI422 / CP810<br>right: CI512 / CP810         | 2           | 37          | 29          | + | 50          | 30          |
|          | 42 | f | 25        | preCIU  | unknown                         | CI422 / CP810                                       | 0           | 24          | 8           | + | 10          | 5           |
|          | 43 | f | 42        | preCIU  | epidemic parotitis 1.Lebensjahr | Concerto / Opus 2                                   | 3           | 36          | 78          | + | 60          | 0           |
|          | 44 | f | 30        | preCIU  | otitis media                    | left: M Pulsar / Opus 2<br>right: Concerto / Opus 2 | 1           | 22          | 103         | + | 70          | 10          |
|          | 45 | f | 54        | preCIU  | premature birth, complications  | CI422 / CP810                                       | 0           | 54          | 8           | + | 50          | 10          |
|          | 46 | m | 47        | preCIU  | unknown, innate                 | Concerto / Opus 2                                   | 0           | 46          | 15          | + | 20          | 0           |
|          | 47 | m | 35        | preCIU  | unknown, otitis media           | CI422 / CP810                                       | 3           | 33          | 8           | - | 100         | 20          |

|           |    |   |           |        |                          |                      |            |             |             |   |             |             |
|-----------|----|---|-----------|--------|--------------------------|----------------------|------------|-------------|-------------|---|-------------|-------------|
|           | 48 | m | 42        | preCIU | meningitis               | Concerto /<br>Opus 2 | 0          | 41          | 9           | - | 10          | 0           |
|           | 49 | m | 23        | preCIU | otitis media             | CI422 /<br>CP810     | 2          | 22          | 11          | + | 70          | 20          |
|           | 50 | m | 70        | preCIU | meningitis               | Concerto /<br>Opus 2 | 3          | 69          | 11          | + | 70          | 0           |
|           | 51 | m | 23        | preCIU | Mb. Gusher               | Concerto /<br>Opus 2 | 3          | 20          | 28          | + | 70          | 35          |
|           | 52 | m | 29        | preCIU | unknown, poss.<br>innate | CI422 /<br>CP810     | 0          | 28          | 11          | + | 100         | 30          |
|           | 53 | m | 28        | preCIU | unknown, innate          | CI512 /<br>CP810     | 2          | 26          | 22          | + | 100         | 70          |
| $\bar{x}$ |    |   | <b>36</b> |        |                          |                      | <b>1,5</b> | <b>33,8</b> | <b>28,8</b> |   | <b>65,3</b> | <b>22,3</b> |
